# Supplementary material for: Novel 1,2,3-Triazole Derivatives as Mimics of Steroidal System—Synthesis, Crystal Structures Determination, Hirshfeld Surfaces Analysis and Molecular Docking
Source: MDPI journal article supplement (doi:10.3390/molecules26134059), 2021-07-02
Supplement: s1 [file s1]

## *Electronic Supplementary Information*

### **Novel 1,2,3-triazole derivatives as mimics of steroidal system – synthesis, crystal structures determination, Hirshfeld surfaces analysis and molecular docking**

Mateusz Daśko,<sup>\*a</sup> Anna Dołęga,<sup>a</sup> Magdalena Siedzielnik,<sup>a</sup> Karol Biernacki,<sup>b</sup> Olga Ciupak,<sup>b</sup> Janusz Rachon,<sup>b</sup> and Sebastian Demkowicz<sup>b</sup>

<sup>a</sup> Department of Inorganic Chemistry, Faculty of Chemistry, Gdańsk University of Technology, Narutowicza 11/12, 80-233 Gdansk, Poland, E-mail: mateusz.dasko@pg.edu.pl.

<sup>b</sup> Department of Organic Chemistry, Faculty of Chemistry, Gdańsk University of Technology, Narutowicza 11/12, 80-233 Gdansk, Poland.

|                        |    |
|------------------------|----|
| <b>Figure S1</b> ..... | 2  |
| <b>Figure S2</b> ..... | 2  |
| <b>Figure S3</b> ..... | 3  |
| <b>Figure S4</b> ..... | 3  |
| <b>Figure S5</b> ..... | 4  |
| <b>Table S1</b> .....  | 5  |
| <b>Table S2</b> .....  | 5  |
| <b>Table S3</b> .....  | 7  |
| <b>Table S4</b> .....  | 9  |
| <b>Table S5</b> .....  | 12 |
| <b>Table S6</b> .....  | 14 |
| <b>Table S7</b> .....  | 16 |

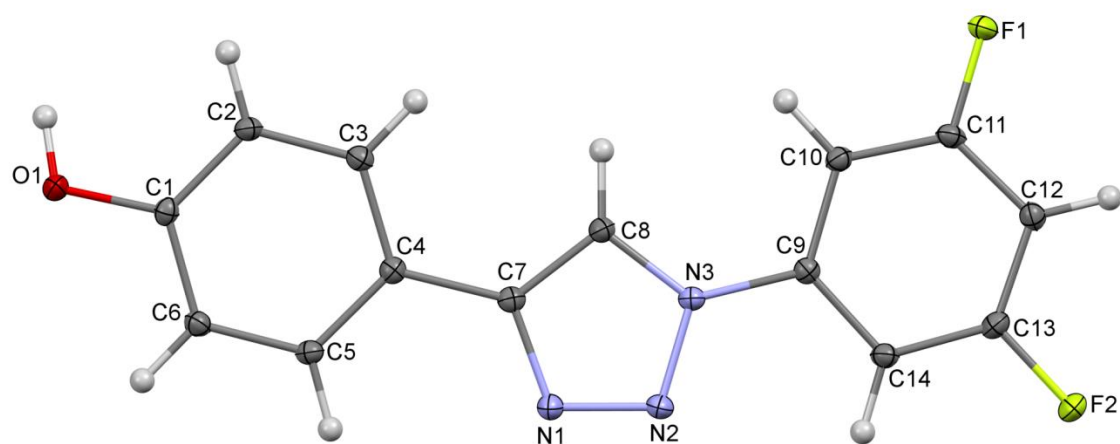

**Figure S1.** Molecular structure of **6b**. Thermal ellipsoids at 50%.

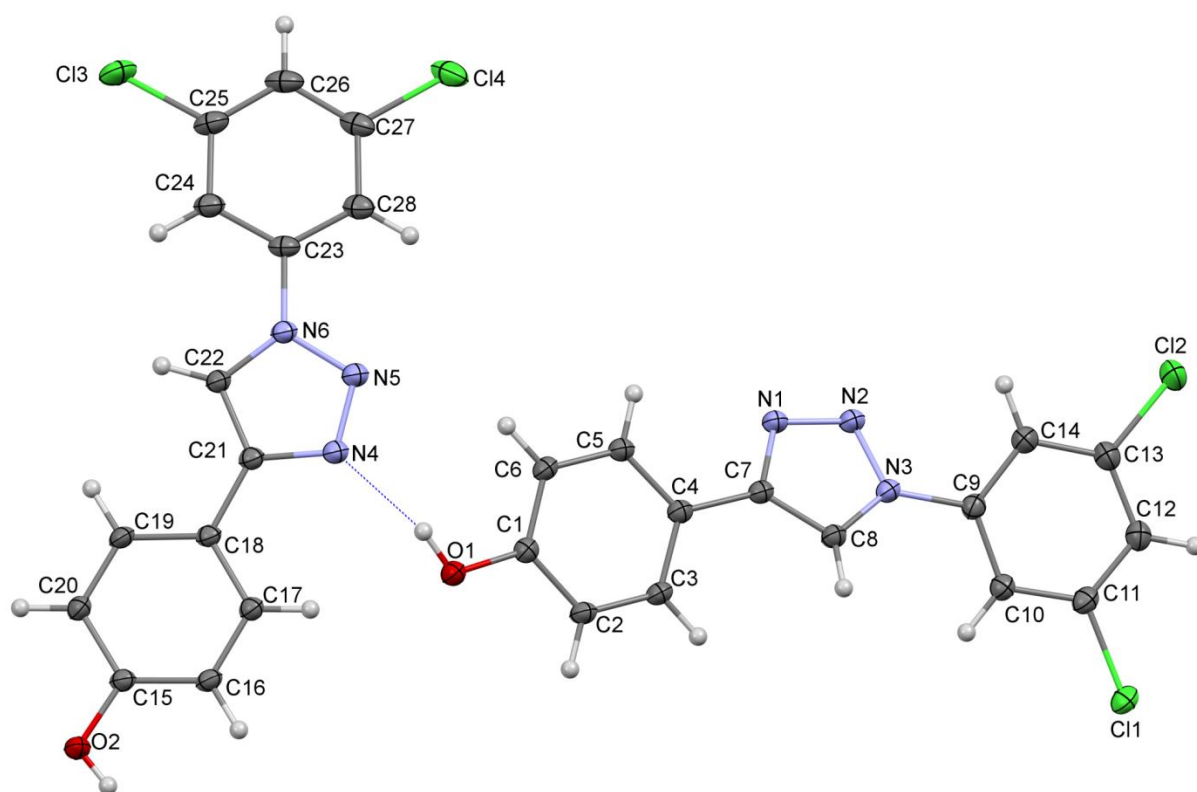

**Figure S2.** Molecular structures of **6e**. Thermal ellipsoids at 50%.

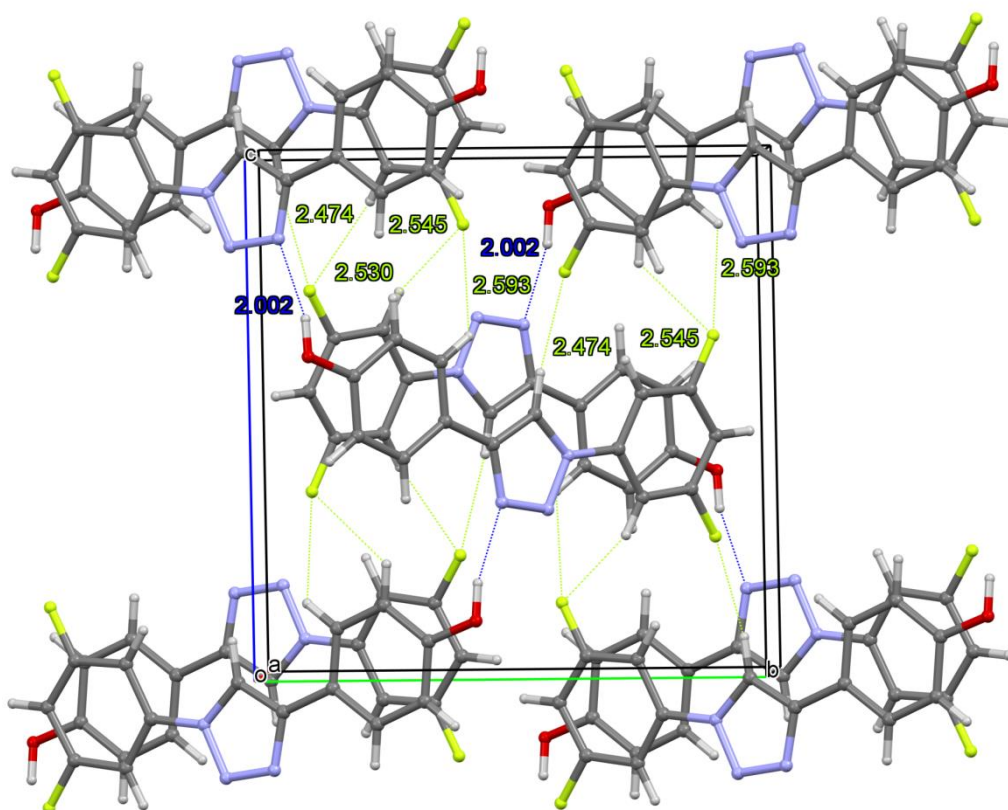

**Figure S3.** Crystal packings and intermolecular interactions in **6b**.

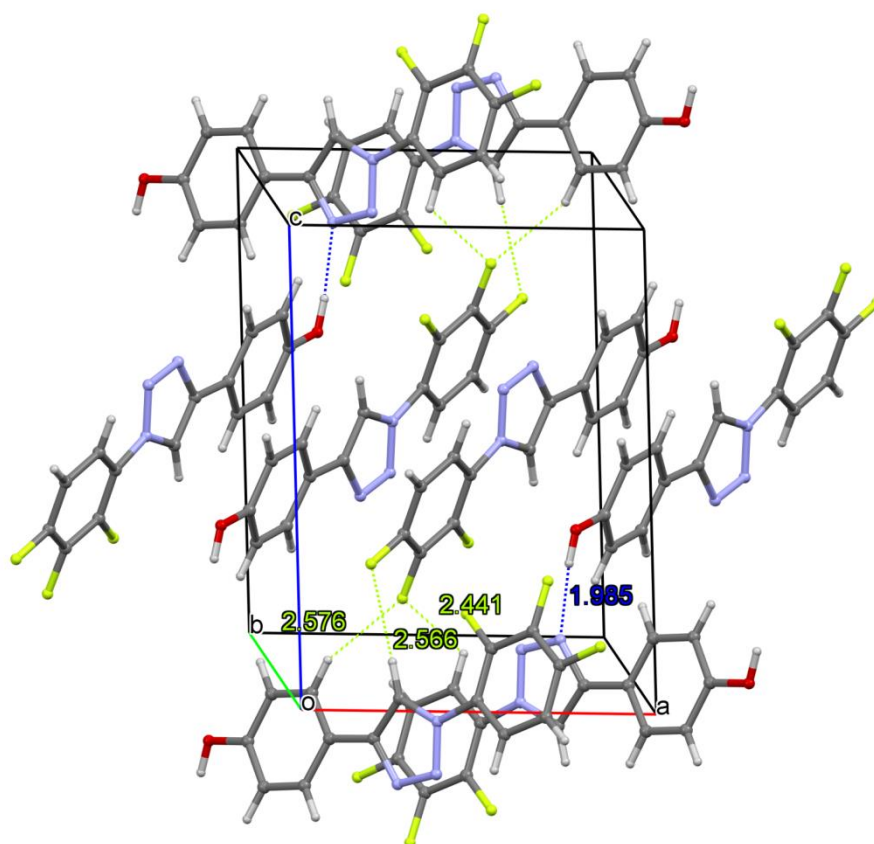

**Figure S4.** Crystal packings and intermolecular interactions in **6c**.

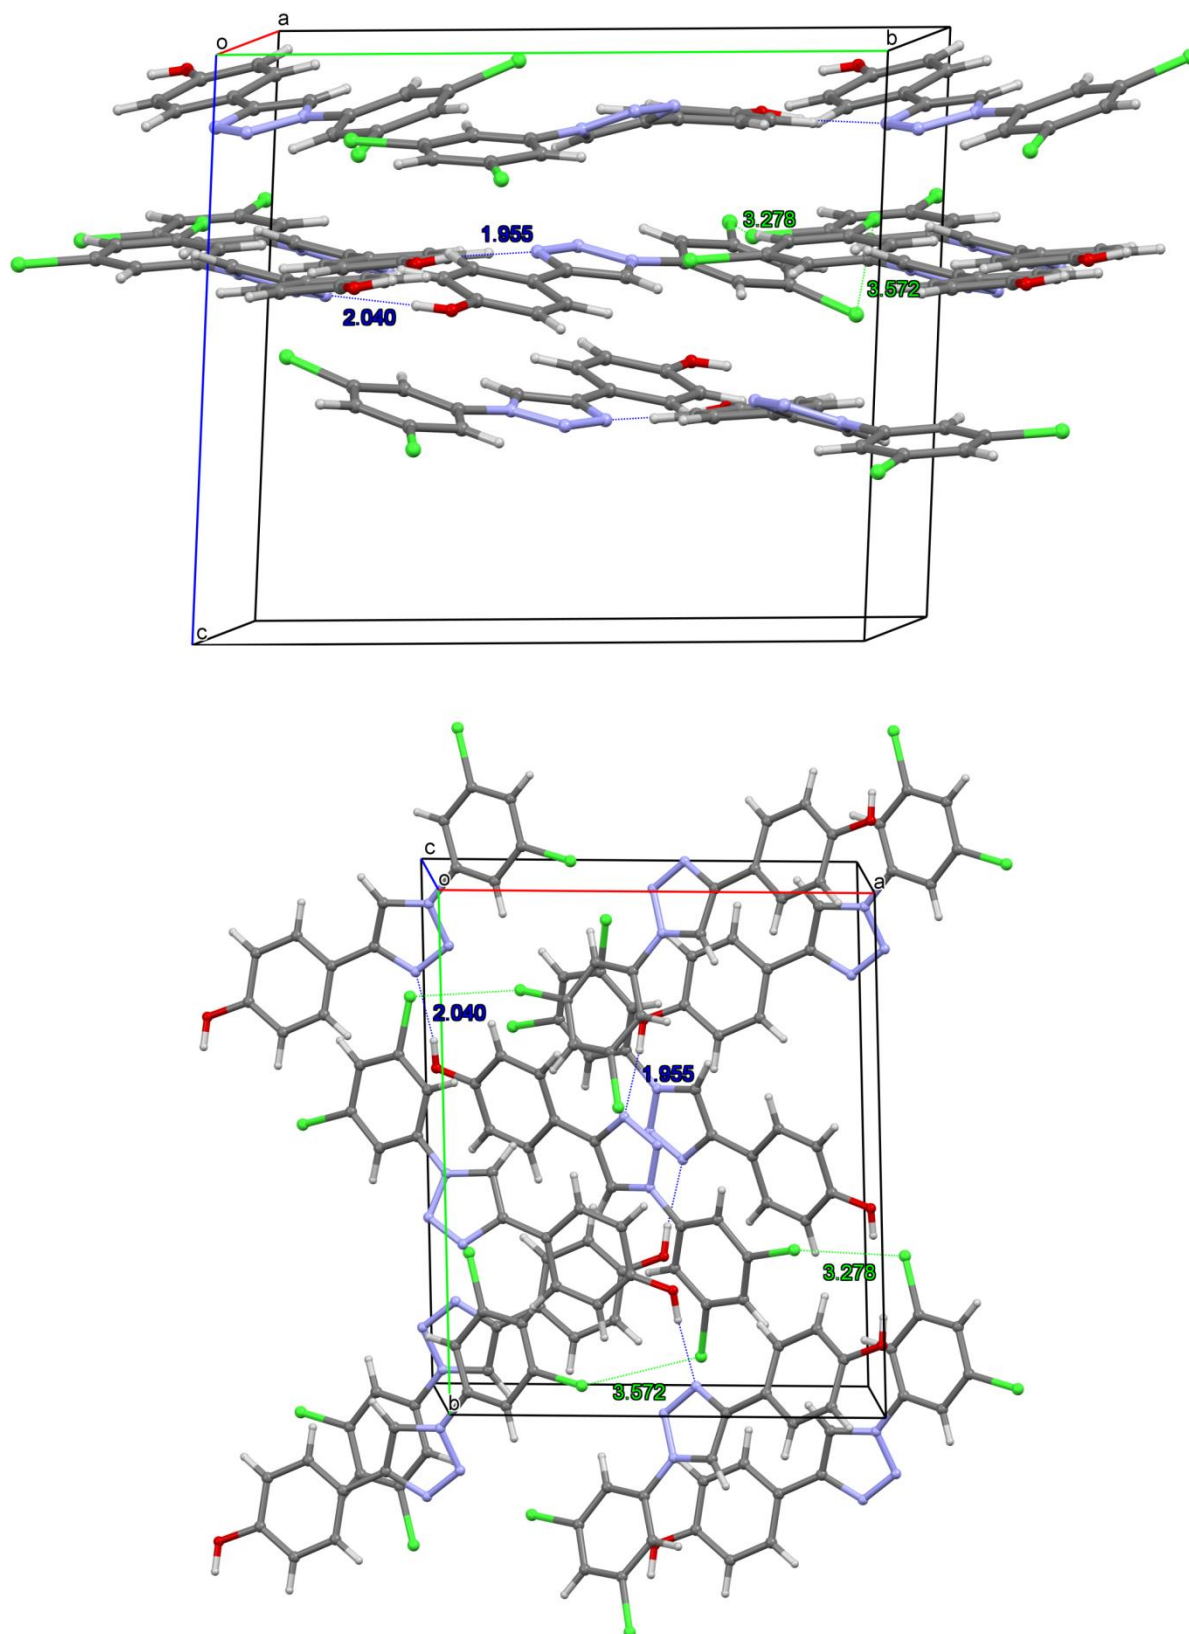

**Figure S5.** Crystal packings and intermolecular interactions in **6e**.

**Table S1.** Bond lengths and angles for **6a-e**.

| Identification code                                                 | <b>6a</b><br>X = F         | <b>6b</b>      | <b>6c</b>      | <b>6d</b><br>X=Cl | <b>6e</b>                   |
|---------------------------------------------------------------------|----------------------------|----------------|----------------|-------------------|-----------------------------|
| Bond lengths [Å]                                                    |                            |                |                |                   |                             |
| Mean C–C in phenol ring(s)                                          | 1.390(8)/1.393(5)          | 1.393(6)       | 1.392(6)       | 1.391(4)          | 1.390(6)/1.390(8)           |
| Mean C–C in halogen substituted ring(s)                             | 1.381(9)/1.384(5)          | 1.382(6)       | 1.380(7)       | 1.387(4)          | 1.382(8)/1.380(4)           |
| C1–O1/C15–O2                                                        | 1.360(4)/1.363(3)          | 1.360(1)       | 1.366(2)       | 1.381(2)          | 1.360(3)/1.359(2)           |
| C4–C7/C18–C21                                                       | 1.463(4)/1.467(4)          | 1.467(2)       | 1.467(2)       | 1.465(3)          | 1.465(3)/1.469(3)           |
| C7–N1/C21–N4                                                        | 1.374(4)/1.373(3)          | 1.369(1)       | 1.365(2)       | 1.374(3)          | 1.367(3)/1.367(3)           |
| N1–N2/N4–N5                                                         | 1.316(3)/1.307(3)          | 1.314(1)       | 1.308(2)       | 1.306(2)          | 1.312(2)/1.315(2)           |
| N2–N3/N5–N6                                                         | 1.347(3)/1.346(3)          | 1.351(1)       | 1.353(2)       | 1.355(2)          | 1.348(2)/1.342(2)           |
| N3–C8/N6–C22                                                        | 1.357(4)/1.355(3)          | 1.356(1)       | 1.355(2)       | 1.358(2)          | 1.353(3)/1.353(3)           |
| C7–C8/C21–C22                                                       | 1.356(4)/1.369(4)          | 1.372(2)       | 1.373(2)       | 1.372(3)          | 1.374(3)/1.371(3)           |
| N3–C9/N6–C23                                                        | 1.425(4)/1.422(4)          | 1.423(1)       | 1.431(2)       | 1.424(2)          | 1.432(3)/1.424(3)           |
| C10–F1                                                              | -                          | -              | 1.345(2)       | -                 | -                           |
| C11–X1/X2/C25–F2/Cl3                                                | X1=F1<br>1.358(3)/1.361(3) | X1=F1 1.354(1) | X2=F2 1.340(2) | X1=Cl1 1.740(2)   | X1=Cl1<br>1.726(2)/1.736(3) |
| C12–F3                                                              | -                          | -              | 1.347(2)       | -                 | -                           |
| C13–X2/C27–Cl4                                                      | -                          | X2=F2 1.358(1) | -              | -                 | X2=Cl2<br>1.725(2)/1.724(3) |
| The torsion angles between the planes of the six-membered rings [°] |                            |                |                |                   |                             |
| plane <sub>C1–C6</sub> and plane <sub>C9–C14</sub>                  | 43.28                      | 3.54           | 3.66           | 49.35             | 9.79                        |
| plane <sub>C15–C20</sub> and plane <sub>C23–C28</sub>               | 50.41                      | -              | -              | -                 | 0.90                        |

**Table S2.** Structural parameters for intramolecular interactions in **6a-e**

| <b>6a</b>                                                                                                                                                        |            |              |              |            |
|------------------------------------------------------------------------------------------------------------------------------------------------------------------|------------|--------------|--------------|------------|
| Hydrogen bonds                                                                                                                                                   |            |              |              |            |
| D–H...A                                                                                                                                                          | d(D–H) [Å] | d(H...A) [Å] | d(D...A) [Å] | <(DHA) [°] |
| O2–H2...N1 <sup>i</sup>                                                                                                                                          | 0.97(4)    | 1.85(4)      | 2.770(3)     | 157(3)     |
| O2–H2...N2 <sup>i</sup>                                                                                                                                          | 0.97(4)    | 2.53(4)      | 3.265(3)     | 133(3)     |
| O1–H1...N5                                                                                                                                                       | 1.02(4)    | 2.55(4)      | 3.200(3)     | 122(3)     |
| O1–H1...N4                                                                                                                                                       | 1.02(4)    | 1.82(4)      | 2.758(3)     | 151(3)     |
| C22–H22...F1 <sup>ii</sup>                                                                                                                                       | 0.95       | 2.34         | 3.288(3)     | 173.3      |
| C26–H26...O2 <sup>iii</sup>                                                                                                                                      | 0.95       | 2.57         | 3.291(4)     | 132.7      |
| C8–H8...F2 <sup>iv</sup>                                                                                                                                         | 0.95       | 2.52         | 3.349(3)     | 146.5      |
| C12–H12...O1 <sup>iv</sup>                                                                                                                                       | 0.95       | 2.45         | 3.192(4)     | 134.5      |
| Symmetry transformations used to generate equivalent atoms: <sup>i</sup> x, y+1, z; <sup>ii</sup> x, y+1, z-1; <sup>iii</sup> x, y, z-1; <sup>iv</sup> x, y, z+1 |            |              |              |            |
| <b>6b</b>                                                                                                                                                        |            |              |              |            |
| Hydrogen bonds                                                                                                                                                   |            |              |              |            |
| D–H...A                                                                                                                                                          | d(D–H) [Å] | d(H...A) [Å] | d(D...A) [Å] | <(DHA) [°] |
| C8–H8...F2 <sup>i</sup>                                                                                                                                          | 0.95       | 2.47         | 3.4075(16)   | 167.2      |
| C10–H10...F2 <sup>i</sup>                                                                                                                                        | 0.95       | 2.53         | 3.4552(15)   | 164.5      |
| C2–H2...F1 <sup>ii</sup>                                                                                                                                         | 0.95       | 2.55         | 3.1779(14)   | 124.2      |

|                                                                                                                                                                                                      |            |              |              |            |
|------------------------------------------------------------------------------------------------------------------------------------------------------------------------------------------------------|------------|--------------|--------------|------------|
| C12-H12...O1 <sup>iii</sup>                                                                                                                                                                          | 0.95       | 2.43         | 3.2566(15)   | 145.0      |
| O1-H1...N1 <sup>iv</sup>                                                                                                                                                                             | 0.867(19)  | 2.002(19)    | 2.8454(15)   | 164.0(16)  |
| O1-H1...N2 <sup>iv</sup>                                                                                                                                                                             | 0.867(19)  | 2.648(18)    | 3.3207(14)   | 135.3(14)  |
| Symmetry transformations used to generate equivalent atoms: <sup>i</sup> x+1/2, -y+3/2, z+1/2; <sup>ii</sup> 2 -x+3/2, y-1/2, -z+3/2; <sup>iii</sup> x-1, y+1, z; <sup>iv</sup> x+1/2, -y+1/2, z+1/2 |            |              |              |            |
| 6c                                                                                                                                                                                                   |            |              |              |            |
| Hydrogen bonding                                                                                                                                                                                     |            |              |              |            |
| D-H...A                                                                                                                                                                                              | d(D-H) [Å] | d(H...A) [Å] | d(D...A) [Å] | <(DHA) [°] |
| O1-H1...N1 <sup>i</sup>                                                                                                                                                                              | 0.87(2)    | 1.99(2)      | 2.8514(18)   | 174.4(18)  |
| C8-H8...F3 <sup>ii</sup>                                                                                                                                                                             | 0.95       | 2.58         | 3.5259(19)   | 178.2      |
| C6-H6...N1 <sup>i</sup>                                                                                                                                                                              | 0.95       | 2.66         | 3.348(2)     | 129.9      |
| C14-H14...F2 <sup>iii</sup>                                                                                                                                                                          | 0.95       | 2.44         | 2.9197(19)   | 111.0      |
| C13-H13...O1 <sup>iv</sup>                                                                                                                                                                           | 0.95       | 2.53         | 3.423(2)     | 156.1      |
| Symmetry transformations used to generate equivalent atoms: <sup>i</sup> -x+2, y+1/2, -z+3/2; <sup>ii</sup> -x+1, y+1/2, -z+1/2; <sup>iii</sup> 3 x, -y+1/2, z+1/2; <sup>iv</sup> x-1, y-1, z        |            |              |              |            |
| 6d                                                                                                                                                                                                   |            |              |              |            |
| Hydrogen bonding                                                                                                                                                                                     |            |              |              |            |
| D-H...A                                                                                                                                                                                              | d(D-H) [Å] | d(H...A) [Å] | d(D...A) [Å] | <(DHA) [°] |
| O1-H1...O1 <sup>i</sup>                                                                                                                                                                              | 0.78(3)    | 2.30(3)      | 3.0651(12)   | 165(3)     |
| C8-H8...N2 <sup>ii</sup>                                                                                                                                                                             | 0.95       | 2.68         | 3.606(3)     | 163.7      |
| C8-H8...N1 <sup>ii</sup>                                                                                                                                                                             | 0.95       | 2.63         | 3.566(3)     | 167.4      |
| Possible halogen bonding interaction                                                                                                                                                                 |            |              |              |            |
| Cl1...Cl1 <sup>iii</sup>                                                                                                                                                                             | 3.6618(8)  |              |              |            |
| Symmetry transformations used to generate equivalent atoms: <sup>i</sup> -x+1, y-1/2, -z+1/2; <sup>ii</sup> x, y+1, z; <sup>iii</sup> 2-x; 1/2+y, 3/2-z                                              |            |              |              |            |
| 6e                                                                                                                                                                                                   |            |              |              |            |
| Hydrogen bonding                                                                                                                                                                                     |            |              |              |            |
| D-H...A                                                                                                                                                                                              | d(D-H) [Å] | d(H...A) [Å] | d(D...A) [Å] | <(DHA) [°] |
| O2-H2A...N1 <sup>i</sup>                                                                                                                                                                             | 0.78(3)    | 2.04(3)      | 2.813(3)     | 170(3)     |
| O1-H1...N4                                                                                                                                                                                           | 0.86(3)    | 1.96(3)      | 2.801(3)     | 167(3)     |
| C16-H16...N2 <sup>i</sup>                                                                                                                                                                            | 0.95       | 2.66         | 3.515(3)     | 150.1      |
| C24-H24...O1 <sup>ii</sup>                                                                                                                                                                           | 0.95       | 2.57         | 3.135(3)     | 118.0      |
| C28-H28...Cl2 <sup>iii</sup>                                                                                                                                                                         | 0.95       | 2.80         | 3.698(3)     | 158.7      |
| Halogen bonding                                                                                                                                                                                      |            |              |              |            |
| Cl4...Cl1 <sup>iv</sup>                                                                                                                                                                              | 3.278(2)   |              |              |            |
| Symmetry transformations used to generate equivalent atoms: <sup>i</sup> x+1, y, z; <sup>ii</sup> -x+1,-y+1,-z+1; <sup>iii</sup> -x, y-1/2, -z+3/2; <sup>iv</sup> x, -1+y, z                         |            |              |              |            |

**Table S3.** The ligand-protein (AROM) interactions (and distances [Å]) identified using BIOVIA, Dassault Systèmes, Discovery Studio Visualiser.

| <div> <div> <div>Interactions</div> <div> <div>van der Waals</div> <div>Conventional Hydrogen Bond</div> <div>Pi-Alkyl</div> </div> </div> <div> </div> <div> <div>Interactions</div> <div> <div>van der Waals</div> <div>Conventional Hydrogen Bond</div> <div>Halogen (Fluorine)</div> <div>Pi-Alkyl</div> </div> </div> <div> </div> </div> <div> <div>6a</div> <div>6b</div> </div> |                                                                        |                 |                                                            |                        |                                                                           |               |               |                              |
|-----------------------------------------------------------------------------------------------------------------------------------------------------------------------------------------------------------------------------------------------------------------------------------------------------------------------------------------------------------------------------------------|------------------------------------------------------------------------|-----------------|------------------------------------------------------------|------------------------|---------------------------------------------------------------------------|---------------|---------------|------------------------------|
| No.                                                                                                                                                                                                                                                                                                                                                                                     | Type of interaction                                                    |                 |                                                            |                        |                                                                           |               |               |                              |
|                                                                                                                                                                                                                                                                                                                                                                                         | van der Waals                                                          | Conventional HB | Alkyl                                                      | $\pi$ - $\pi$ -T-shape | $\pi$ -alkyl                                                              | Carbon HB     | Sulfur-X      | Halogen                      |
| 6a                                                                                                                                                                                                                                                                                                                                                                                      | ARG115, PHE134, TRP224, ILE305, ASP309, THR310, LEU372, VAL373         | MET374 (3.45)   | -                                                          | -                      | ILE133 (5.05), ALA306 (5.35), VAL370 (5.37, 5.46), LEU477 (6.06)          | -             | -             | -                            |
| 6b                                                                                                                                                                                                                                                                                                                                                                                      | ARG115, PHE134, TRP224, ILE305, THR310, VAL373, MET374, ILE395, LEU477 | LEU372 (3.48)   | -                                                          | -                      | ILE133 (4.79), ALA306 (5.26), VAL370 (5.46, 5.50)                         | -             | -             | ASP309 (3.98)                |
| 6c                                                                                                                                                                                                                                                                                                                                                                                      | ARG115, PHE134, PHE221, GLU302, THR310, LEU372, VAL373, ILE395         | -               | -                                                          | TRP224 (7.18)          | ILE133 (5.22), ALA306 (5.82), VAL370 (5.46), MET374 (6.28), LEU477 (5.81) | ALA306 (2.84) | MET374 (3.29) | ILE305 (3.82), ASP309 (4.12) |
| 6d                                                                                                                                                                                                                                                                                                                                                                                      | ARG115, PHE134, ASP309, THR310, VAL370, LEU372, VAL373, ILE395         | -               | ILE133 (5.50), TRP224 (4.32), ILE305 (7.01), ALA306 (3.46) | -                      | ILE133 (5.13), ALA306 (5.87), MET374 (6.05), LEU477 (6.10)                | -             | MET374 (3.44) | -                            |

|                        |                                                                                         |                                 |                                                         |               |                                                                  |               |   |               |
|------------------------|-----------------------------------------------------------------------------------------|---------------------------------|---------------------------------------------------------|---------------|------------------------------------------------------------------|---------------|---|---------------|
| <i>6e</i>              | PHE221, MET303, ILE305,<br>ASP309, THR310, VAL369,<br>ASP371, VAL373, SER478            | GLU302 (4.91)                   | PHE134<br>(6.28),<br>VAL370<br>(5.37), LEU477<br>(5.01) | TRP224 (6.90) | ILE133 (5.03), ALA306<br>(5.13), VAL370 (5.01),<br>LEU477 (4.93) | -             | - | MET374 (3.74) |
| <i>Androstenedione</i> | ILE133, PHE134, PHE221,<br>ILE305, ASP309, THR310,<br>LEU372, VAL373, LEU477,<br>SER478 | ARG115 (4.05),<br>MET374 (4.03) | TRP224 (7.49),<br>VAL370 (6.51)                         | -             | -                                                                | ALA306 (3.36) | - | -             |



**Table S4.** The ligand-protein (STS) interactions (and distances [Å]) identified using BIOVIA, Dassault Systèmes, Discovery Studio Visualiser.

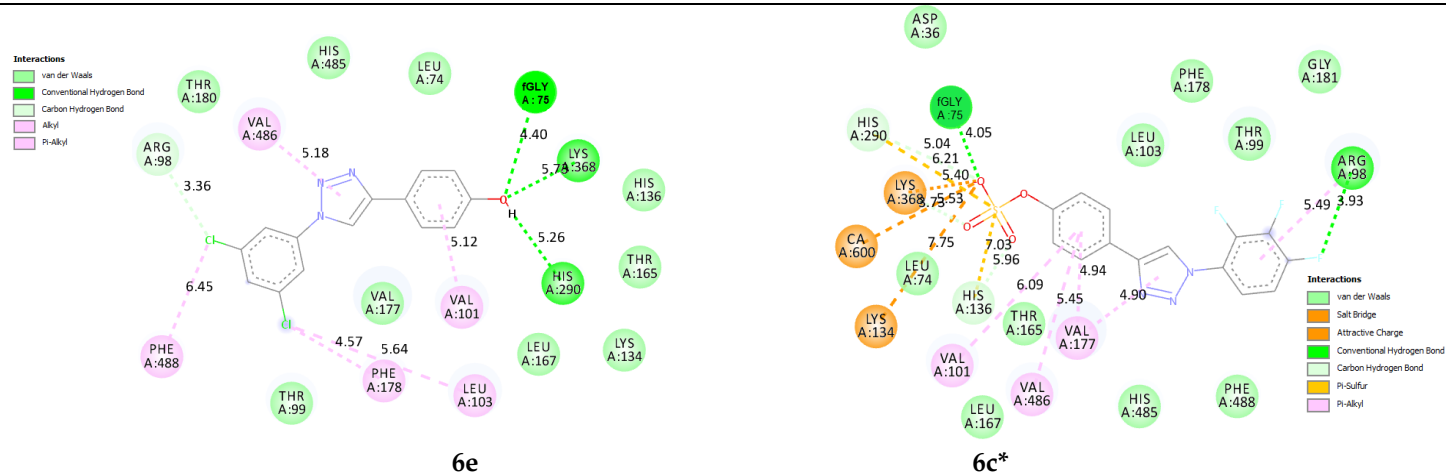

| No. | Type of interaction                                                                  |                 |               |       |                        |                                                  |                              |                              |             |                   |              |                         |
|-----|--------------------------------------------------------------------------------------|-----------------|---------------|-------|------------------------|--------------------------------------------------|------------------------------|------------------------------|-------------|-------------------|--------------|-------------------------|
|     | van der Waals                                                                        | Conventional HB | $\pi$ -cation | Alkyl | $\pi$ - $\pi$ -T-shape | $\pi$ -alkyl                                     | Carbon HB                    | $\pi$ -sulfur                | Salt bridge | Attractive charge | Halogen      | Unfavorable donor-donor |
| 6a  | LEU74, THR99, LEU103, LYS134, HIS136, THR165, LEU167, THR180, HIS290, THR484, VAL486 | -               | LYS368 (6.86) | -     | PHE488 (7.37)          | VAL101 (5.39), VAL177 (4.87)                     | HIS485 (5.13)                | -                            | -           | -                 | ARG98 (3.77) | -                       |
| 6a* | LEU74, THR99, VAL101, LEU103, THR165, LEU167, THR180, THR484, PHE488                 | fGLY75 (4.21)   | -             | -     | HIS485 (5.02)          | ARG98 (5.39), VAL177 (4.76), VAL486 (5.02, 5.20) | HIS136 (6.24), HIS485 (4.47) | HIS290 (6.07), HIS136 (7.23) | -           | LYS368 (5.83)     | -            | -                       |

|            |                                                                                                     |                                                   |   |                                       |                  |                                                                                         |                                                            |                                       |                                                                   |                                                                   |                          |               |
|------------|-----------------------------------------------------------------------------------------------------|---------------------------------------------------|---|---------------------------------------|------------------|-----------------------------------------------------------------------------------------|------------------------------------------------------------|---------------------------------------|-------------------------------------------------------------------|-------------------------------------------------------------------|--------------------------|---------------|
| <b>6b</b>  | LEU74, fGLY75,<br>THR99, LEU103,<br>HIS136, LEU167,<br>VAL177, PHE178,<br>THR180, HIS290,<br>PHE488 | -                                                 | - | -                                     | -                | ARG98<br>(6.05),<br>VAL101<br>(5.02),<br>VAL486<br>(5.02)                               | ARG98<br>(6.05)                                            | -                                     | -                                                                 | -                                                                 | ARG98<br>(2.96)          | LYS368 (4.76) |
| <b>6b*</b> | LEU74, THR99,<br>LEU103, THR165,<br>LEU167, PHE178,<br>THR180, GLY181,<br>PHE488                    | fGLY75 (4.07),<br>LYS368 (5.20)                   | - | -                                     | -                | VAL101<br>(6.15),<br>VAL177<br>(4.63,<br>4.66),<br>VAL486<br>(5.44)                     | HIS136<br>(5.66),<br>HIS290<br>(5.17)                      | HIS136<br>(7.10),<br>HIS290<br>(6.10) | -                                                                 | LYS134<br>(7.38),<br>LYS368<br>(7.45)                             | ARG98<br>(3.08)          | -             |
| <b>6c</b>  | LEU74, LEU103,<br>HIS136, THR165,<br>LEU167, THR180,<br>LYS368, THR484,<br>HIS485, VAL486           | fGLY75 (4.37),<br>HIS290 (4.91)                   | - | -                                     | PHE488<br>(7.31) | ARG98<br>(6.36),<br>VAL101<br>(5.34),<br>VAL177<br>(4.90)                               | ARG98<br>(3.24),<br>THR99<br>(3.91)                        | -                                     | -                                                                 | -                                                                 | ARG98<br>(3.55,<br>5.93) | -             |
| <b>6c*</b> | ASP36, LEU74,<br>THR99, LEU103,<br>THR165, LEU167,<br>PHE178, GLY181,<br>HIS485, PHE488             | fGLY75 (4.05)                                     | - | -                                     | -                | ARG98<br>(5.49),<br>VAL101<br>(6.09),<br>VAL177<br>(4.90,<br>4.94),<br>VAL486<br>(5.45) | HIS136<br>(5.96),<br>HIS290<br>(5.04),<br>LYS368<br>(3.73) | HIS136<br>(7.03),<br>HIS290<br>(6.21) | LYS134<br>(7.75),<br>LYS368<br>(5.40), Ca <sup>2+</sup><br>(5.53) | LYS134<br>(7.75),<br>LYS368<br>(5.40), Ca <sup>2+</sup><br>(5.53) | -                        | -             |
| <b>6d</b>  | LEU74, THR99,<br>LYS134, HIS136,<br>THR165, LEU167,<br>VAL177, PHE488                               | fGLY75 (4.31),<br>HIS290 (5.65),<br>LYS368 (5.66) | - | LEU103<br>(5.89),<br>PHE178<br>(5.09) | -                | ARG98<br>(6.12),<br>VAL101<br>(4.97),<br>VAL486<br>(5.05),                              | -                                                          | -                                     | -                                                                 | -                                                                 | -                        | -             |

|            |                                                                                         |                                                   |                  |                                                            |   |                                                                                          |                                                           |                                       |                                                                   |                                                                   |   |   |
|------------|-----------------------------------------------------------------------------------------|---------------------------------------------------|------------------|------------------------------------------------------------|---|------------------------------------------------------------------------------------------|-----------------------------------------------------------|---------------------------------------|-------------------------------------------------------------------|-------------------------------------------------------------------|---|---|
| <b>6d*</b> |                                                                                         |                                                   |                  |                                                            |   |                                                                                          |                                                           |                                       |                                                                   |                                                                   |   |   |
|            | LEU74, THR99,<br>LEU103, THR165,<br>LEU167, THR180,<br>THR484, HIS485,<br>PHE488        | fGLY75 (4.18),<br>LYS368 (5.37)                   | -                | -                                                          | - | ARG98<br>(5.34),<br>VAL101<br>(6.26),<br>VAL177<br>(4.84),<br>VAL486<br>(5.25, 5.41)     | HIS136<br>(6.04)                                          | HIS136<br>(7.26),<br>HIS290<br>(6.20) | -                                                                 | LYS134<br>(7.93),<br>LYS368<br>(7.26)                             | - | - |
| <b>6e</b>  |                                                                                         |                                                   |                  |                                                            |   |                                                                                          |                                                           |                                       |                                                                   |                                                                   |   |   |
|            | LEU74, THR99,<br>LYS134, HIS136,<br>THR165, LEU167,<br>VAL177, THR180,<br>HIS485        | fGLY75 (4.40),<br>HIS290 (5.26),<br>LYS368 (5.73) | -                | LEU103<br>(5.64),<br>PHE178<br>(4.57),<br>PHE488<br>(6.45) | - | VAL101<br>(5.12),<br>VAL486<br>(5.18)                                                    | ARG98<br>(3.36)                                           | -                                     | -                                                                 | -                                                                 | - | - |
| <b>6e*</b> |                                                                                         |                                                   |                  |                                                            |   |                                                                                          |                                                           |                                       |                                                                   |                                                                   |   |   |
|            | LEU74, THR99,<br>THR165, LEU167,<br>HIS485                                              | fGLY (4.12)                                       | -                | ARG98<br>(3.17),<br>PHE178<br>(4.47)                       | - | VAL101<br>(5.86),<br>LEU103,<br>(6.02)<br>VAL177<br>(4.86,<br>4.90),<br>VAL486<br>(5.84) | ARG98<br>(3.94),<br>HIS136<br>(6.08),<br>LYS368<br>(5.69) | HIS136<br>(7.03),<br>HIS290<br>(6.28) | LYS134<br>(7.88),<br>LYS368<br>(5.33), Ca <sup>2+</sup><br>(3.84) | LYS134<br>(7.88),<br>LYS368<br>(5.33), Ca <sup>2+</sup><br>(3.84) | - | - |
| <b>E1</b>  |                                                                                         |                                                   |                  |                                                            |   |                                                                                          |                                                           |                                       |                                                                   |                                                                   |   |   |
|            | LEU74, ARG98,<br>THR99, GLY100,<br>LYS134, HIS136,<br>THR165, LEU167,<br>VAL486, PHE488 | fGLY75 (4.07),<br>HIS290 (5.27)                   | LYS368<br>(5.08) | LEU103<br>(6.83),<br>VAL177<br>(6.11)                      | - | VAL101<br>(4.37)                                                                         | -                                                         | -                                     | -                                                                 | -                                                                 | - | - |
| <b>E1S</b> |                                                                                         |                                                   |                  |                                                            |   |                                                                                          |                                                           |                                       |                                                                   |                                                                   |   |   |
|            | ASP36, LEU74,<br>ARG98, THR99,<br>GLY100, LEU103,<br>THR165, THR180,<br>THR484, PHE488  | fGLY75 (3.47)                                     | -                | HIS485<br>(7.00),<br>VAL486<br>(4.89)                      | - | VAL101<br>(3.80),<br>VAL486<br>(6.35)                                                    | HIS136<br>(6.18),<br>HIS290<br>(5.08)                     | HIS136<br>(7.18),<br>HIS290<br>(5.08) | LYS134<br>(5.16),<br>LYS368<br>(5.07), Ca <sup>2+</sup><br>(3.47) | LYS134<br>(5.16),<br>LYS368<br>(5.07), Ca <sup>2+</sup><br>(3.47) | - | - |

\* in sulfated form

|

**Table S5.** The ligand-protein (17β-HSD1) interactions (and distances [Å]) identified using BIOVIA, Dassault Systèmes, Discovery Studio Visualiser.

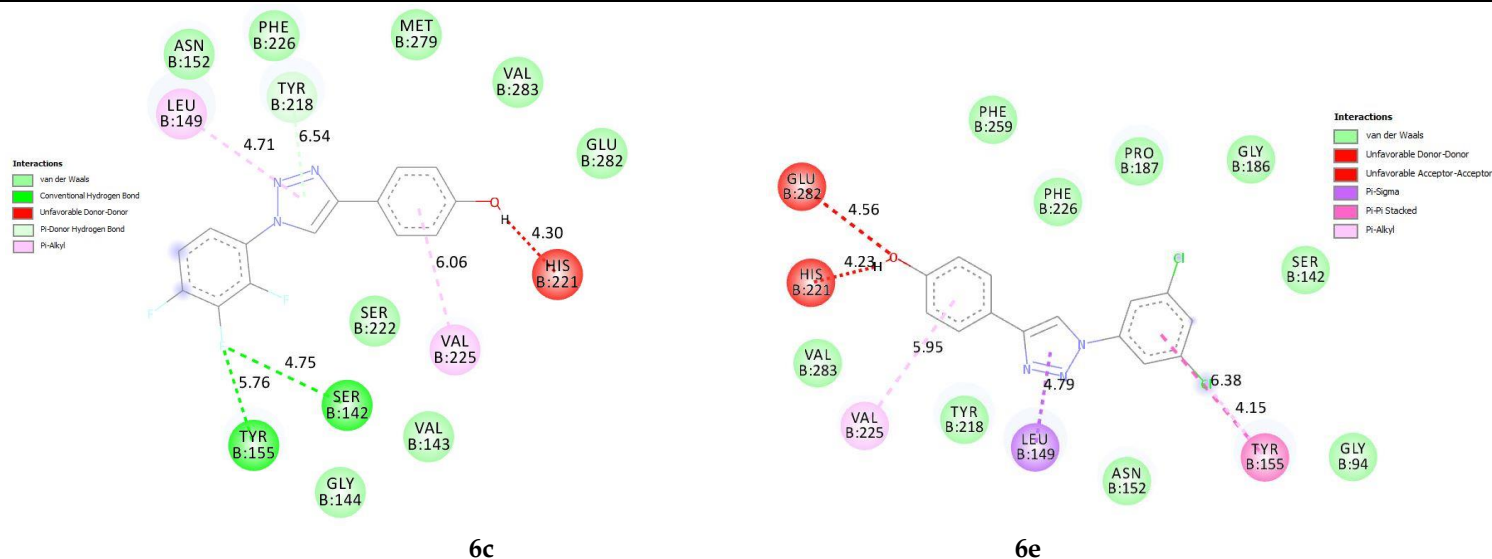

| No. | Type of interaction                                    |                 |       |               |               |               |                         |                 |                  |                       |                               |
|-----|--------------------------------------------------------|-----------------|-------|---------------|---------------|---------------|-------------------------|-----------------|------------------|-----------------------|-------------------------------|
|     | van der Waals                                          | Conventional HB | Alkyl | $\pi$ -alkyl  | Carbon HB     | Halogen       | Unfavorable donor-donor | $\pi$ -donor HB | $\pi$ - $\sigma$ | $\pi$ - $\pi$ stacked | Unfavorable acceptor-acceptor |
| 6a  | PRO187, TYR218, HIS221, PHE226, PHE259, GLU282, VAL283 | -               | -     | VAL225 (5.79) | -             | ASN152 (5.73) | -                       | -               | LEU149 (5.01)    | TYR155 (6.65)         |                               |
| 6b  | ASN152, HIS221, TYR218, PHE226, PHE259, GLU282, VAL283 | -               | -     | VAL225 (5.82) | PRO187 (4.11) | GLY186 (4.58) | -                       | -               | LEU149 (4.91)    | TYR155 (6.55)         | -                             |

|           |                                                                                   |                                 |                                                   |                                       |   |                  |               |                  |                  |                  |               |
|-----------|-----------------------------------------------------------------------------------|---------------------------------|---------------------------------------------------|---------------------------------------|---|------------------|---------------|------------------|------------------|------------------|---------------|
| <b>6c</b> | VAL143, GLY144,<br>ASN152, SER222,<br>PHE226, MET279,<br>GLU282, VAL283           | SER142 (4.75),<br>TYR155 (5.76) | -                                                 | LEU149<br>(4.71),<br>VAL225<br>(6.06) | - | -                | HIS221 (4.30) | TYR218<br>(6.54) | -                | -                | -             |
| <b>6d</b> | GLY94, ASN152,<br>PRO187, TYR218,<br>HIS221, PHE226,<br>PHE259, GLU282,<br>VAL283 | -                               | -                                                 | VAL225<br>(5.86)                      | - | TYR155<br>(4.10) | -             | -                | LEU149<br>(4.91) | TYR155<br>(6.56) | -             |
| <b>6e</b> | GLY94, SER142,<br>ASN152, GLY186,<br>PRO187, TYR218,<br>PHE226, PHE259,<br>VAL283 | -                               | -                                                 | TYR155<br>(6.38),<br>VAL225<br>(5.95) | - | -                | HIS221 (4.23) | -                | Leu149<br>(4.79) | TYR155<br>(6.38) | GLU282 (4.56) |
| <b>E1</b> | SER142, VAL143,<br>ASN152, TYR155,<br>TYR218, PHE226,<br>ARG258, VAL283           | HIS221 (5.20),<br>GLU282 (4.90) | LEU149 (4.60),<br>PRO187 (6.42),<br>PHE259 (7.76) | VAL225<br>(5.69)                      | - | -                | -             | -                | -                | -                | -             |

**Table S6.** The ligand-protein (ER $\alpha$ ) interactions (and distances [Å]) identified using BIOVIA, Dassault Systèmes, Discovery Studio Visualiser.

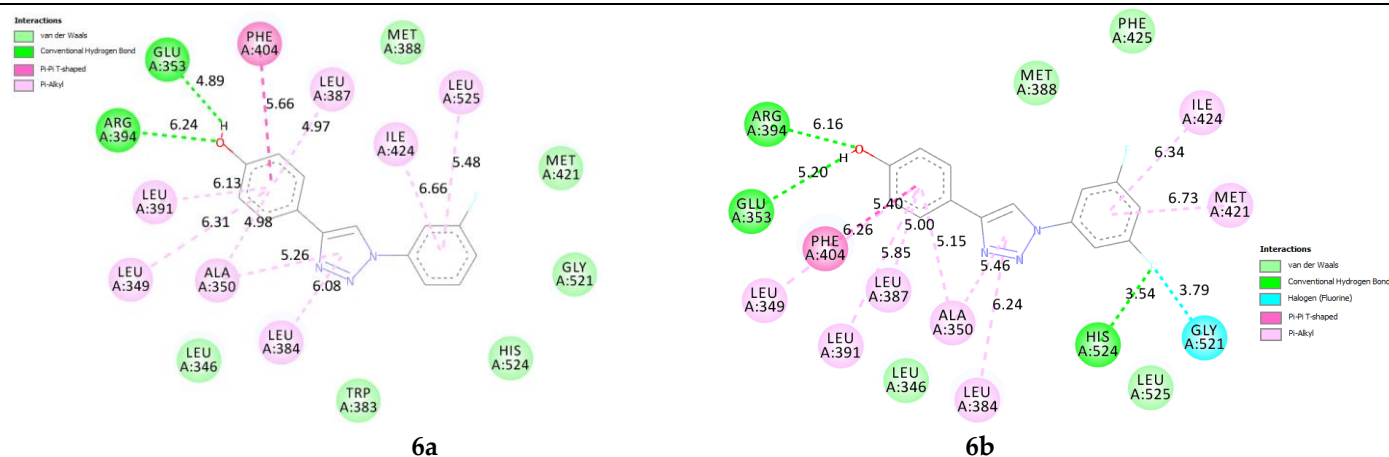

| No.       | Type of interaction                            |                                             |              |                                                  |                                                                                                               |                  |                                |                |                               |
|-----------|------------------------------------------------|---------------------------------------------|--------------|--------------------------------------------------|---------------------------------------------------------------------------------------------------------------|------------------|--------------------------------|----------------|-------------------------------|
|           | <i>van der Waals</i>                           | <i>Conventional HB</i>                      | <i>Alkyl</i> | <i><math>\pi</math>-<math>\pi</math>-T-shape</i> | <i><math>\pi</math>-alkyl</i>                                                                                 | <i>Carbon HB</i> | <i><math>\pi</math>-sulfur</i> | <i>Halogen</i> | <i><math>\pi</math>-anion</i> |
| <b>6a</b> | LEU346, TRP383, MET388, MET421, GLY521, HIS524 | GLU353 (4.89), ARG394 (6.24)                | -            | PHE404 (5.66)                                    | LEU349 (6.31), ALA350 (4.98, 5.26), LEU384 (6.08), LEU391 (6.13), ILE424 (6.66), LEU525 (5.48)                | -                | -                              | -              | -                             |
| <b>6b</b> | LEU346, MET388, PHE425, LEU525                 | ARG394 (6.16), GLU353 (5.20), HIS524 (3.54) | -            | PHE404 (5.40)                                    | LEU349 (6.26), LEU391 (5.85), LEU387 (5.00), ALA350 (5.15, 5.46), LEU384 (6.24), MET421 (6.73), ILE424 (6.34) | -                | -                              | GLY521 (3.79)  | -                             |

|           |                                                                                    |                                                   |                                                                                                         |                  |                                                                                                               |               |                  |               |               |
|-----------|------------------------------------------------------------------------------------|---------------------------------------------------|---------------------------------------------------------------------------------------------------------|------------------|---------------------------------------------------------------------------------------------------------------|---------------|------------------|---------------|---------------|
| <b>6c</b> | GLU353, ALA405,<br>MET421, ILE424,<br>LEU428                                       | ARG394 (6.27),<br>PHE404 (4.44),<br>HIS524 (3.19) | -                                                                                                       | PHE404<br>(5.09) | LEU349 (6.58),<br>ALA350 (5.75),<br>LEU384 (5.68, 6.21),<br>LEU387 (4.85),<br>LEU391 (5.10),<br>LEU525 (6.25) | -             | MET388<br>(5.00) | GLY521 (3.82) | -             |
| <b>6d</b> | LEU428, GLY521                                                                     | GLU353 (4.54),<br>ARG394 (6.31)                   | MET421 (4.00),<br>ILE424 (4.16),<br>HIS524 (3.90)                                                       | PHE404<br>(6.12) | LEU349 (6.61),<br>ALA350 (5.70),<br>LEU384 (5.01, 5.18),<br>LEU387 (4.84),<br>LEU391 (5.20),<br>LEU525 (5.99) | -             | MET388<br>(5.53) | -             | -             |
| <b>6e</b> | MET343, LEU346,<br>TRP384, ILE424, LEU428                                          | THR347 (3.64),<br>ASP351 (4.54),<br>LYS529 (6.24) | LEU387 (4.28),<br>MET388 (3.53),<br>LEU391 (4.69),<br>PHE404 (6.53),<br>MET421 (5.46),<br>PHE425 (5.78) | PHE404<br>(3.84) | ALA350 (4.62, 4.62),<br>LEU525 (5.02, 5.21)                                                                   | LEU384 (4.28) | -                | -             | ASP351 (6.20) |
| <b>E2</b> | MET343, LEU346,<br>LEU349, LEU384,<br>MET421, LEU428,<br>GLY521, HIS524,<br>LEU525 | GLU353 (4.67),<br>ARG394 (6.52)                   | MET388 (6.25),<br>PHE404 (6.20),<br>ILE424 (6.92)                                                       | PHE404<br>(5.20) | ALA350 (5.70),<br>LEU387 (5.20),<br>LEU391 (4.64)                                                             | -             | -                | -             | -             |

**Table S7.** The ligand-protein (ER $\beta$ ) interactions (and distances [Å]) identified using BIOVIA, Dassault Systèmes, Discovery Studio Visualiser.

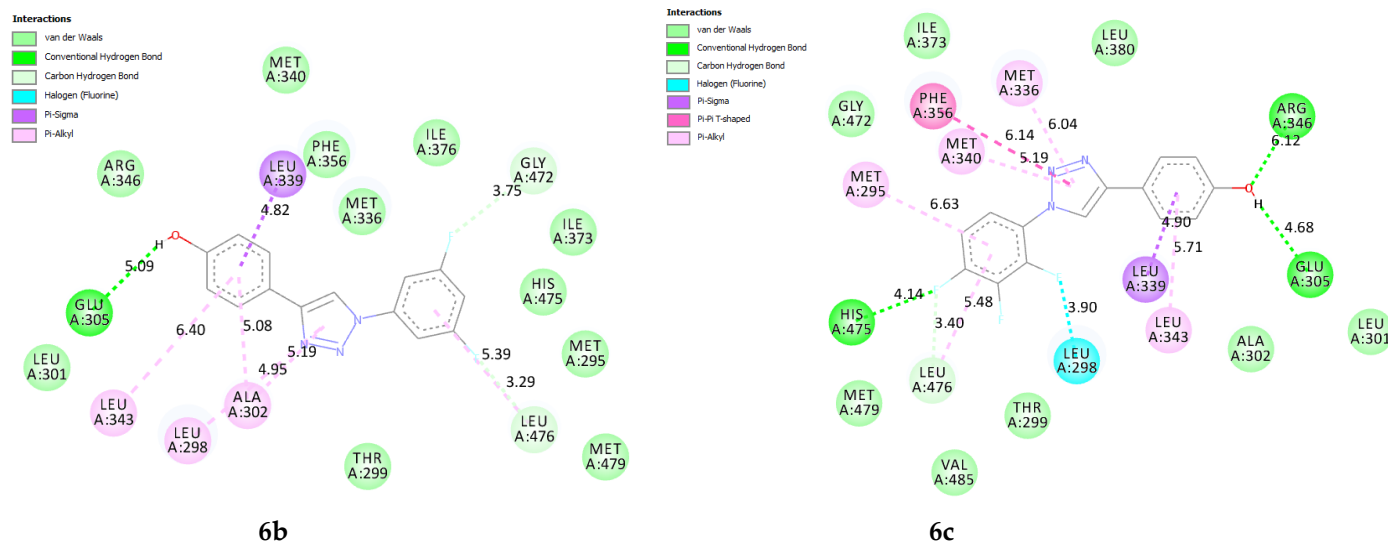

| No. | Type of interaction                                                                    |                 |       |                        |                                                                  |                              |               |                              |               |
|-----|----------------------------------------------------------------------------------------|-----------------|-------|------------------------|------------------------------------------------------------------|------------------------------|---------------|------------------------------|---------------|
|     | van der Waals                                                                          | Conventional HB | Alkyl | $\pi$ - $\pi$ -T-shape | $\pi$ -alkyl                                                     | Carbon HB                    | $\pi$ -sulfur | Halogen                      | $\pi$ -Sigma  |
| 6a  | LEU301, GLU305, ARG346, PHE356, MET340, LEU298, ILE376, ILE373, HIS475, MET295, LEU490 | -               | -     | -                      | LEU343 (6.50), ALA302 (5.05, 5.16), LEU476 (5.14)                | -                            | MET336 (5.90) | GLY472 (3.89)                | LEU339 (4.63) |
| 6b  | LEU301, ARG346, MET340, PHE356, MET336, ILE376, ILE373, HIS475, MET295, MET479, THR299 | GLU305 (5.09)   | -     | -                      | LEU343 (6.40), ALA302 (4.95, 5.08), LEU298 (5.19), LEU476 (5.39) | LEU476 (3.29), GLY472 (3.75) | -             | LEU476 (3.29), GLY472 (3.75) | LEU339 (4.82) |



|           |                                                                                            |                                                   |                                                                                                                  |                  |                                                                           |               |                  |               |                                    |
|-----------|--------------------------------------------------------------------------------------------|---------------------------------------------------|------------------------------------------------------------------------------------------------------------------|------------------|---------------------------------------------------------------------------|---------------|------------------|---------------|------------------------------------|
| <b>6c</b> | GLY472, ILE373,<br>LEU380, LEU301,<br>ALA302, THR299,<br>VAL485, MET479                    | ARG346 (6.12),<br>GLU305 (4.68),<br>HIS475 (4.14) | -                                                                                                                | PHE356<br>(6.14) | MET295 (6.63),<br>MET340 (5.19),<br>MET336 (6.04),<br>LEU343 (5.71)       | LEU476 (3.40) | -                | LEU298 (3.90) | LEU339 (4.90)                      |
| <b>6d</b> | LEU301, ARG346,<br>PHE356, MET340,<br>LEU298, GLY472,<br>THR299, LEU490                    | GLU305 (4.88)                                     | ILE373 (5.09),<br>HIS475 (6.60),<br>ILE376 (4.13)                                                                | -                | LEU476 (5.05),<br>MET295 (6.60),<br>LEU343 (6.57),<br>ALA302 (4.49, 5.01) | -             | MET336<br>(5.90) | -             | MET336<br>(5.90), LEU339<br>(4.57) |
| <b>6e</b> | LEU301, PHE356,<br>MET340, LEU298,<br>GLY472, VAL486,<br>THR299, LEU490                    | ARG346 (6.02),<br>GLU305 (5.28),<br>LEU339 (3.69) | ILE373 (5.10),<br>ILE376 (3.98),<br>HIS475 (4.14,<br>5.14), MET479<br>(4.99), MET295<br>(4.55), LEU476<br>(3.36) | -                | LEU343 (6.54),<br>ALA302 (4.99, 5.06),<br>LEU476 (5.10)                   | -             | MET336<br>(5.95) | -             | LEU339 (4.62),<br>MET336 (5.95)    |
| <b>E2</b> | GLY472, MET479,<br>LEU476, MET295,<br>LEU298, LEU301,<br>ARG346, MET336,<br>LEU380, ILE373 | HIS475 (4.21),<br>GLU305 (4.69)                   | ILE376 (7.09),<br>MET340 (6.43),<br>PHE356 (4.53)                                                                | PHE356<br>(5.40) | LEU339 (6.07),<br>ALA302 (4.48),<br>LEU343 (6.22)                         | -             | -                | -             | -                                  |
